# Supplementary material
Source: Springer Nature journal article supplement (https://www.springerprofessional.de/resource/supplementary/13638_2012_370_MOESM1_ESM.pdf/11897500)

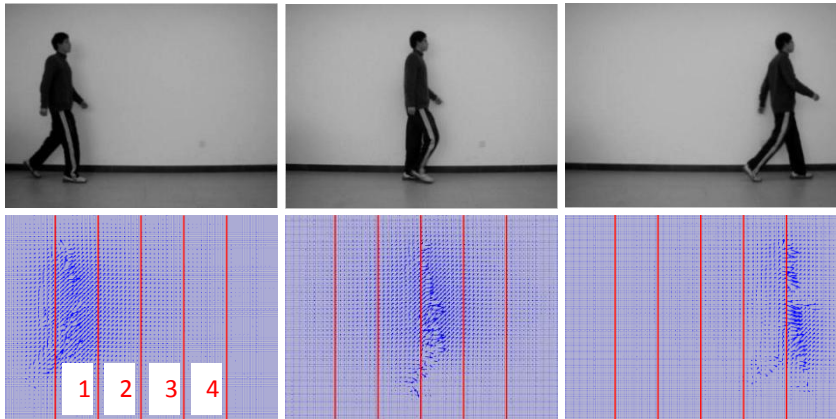

(a) Walking

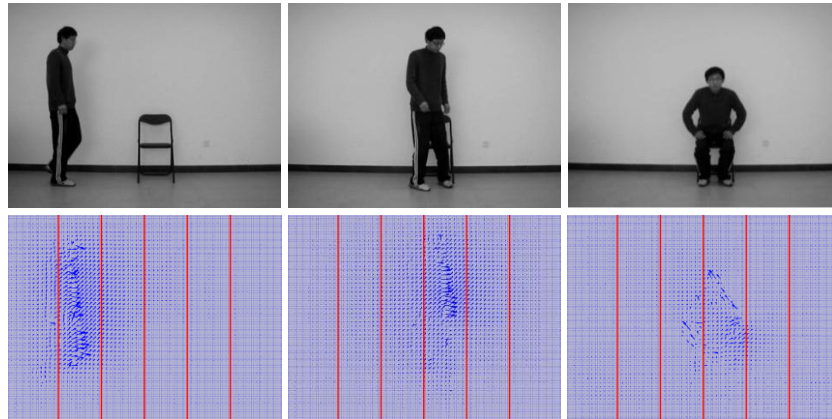

(b) Sitting down

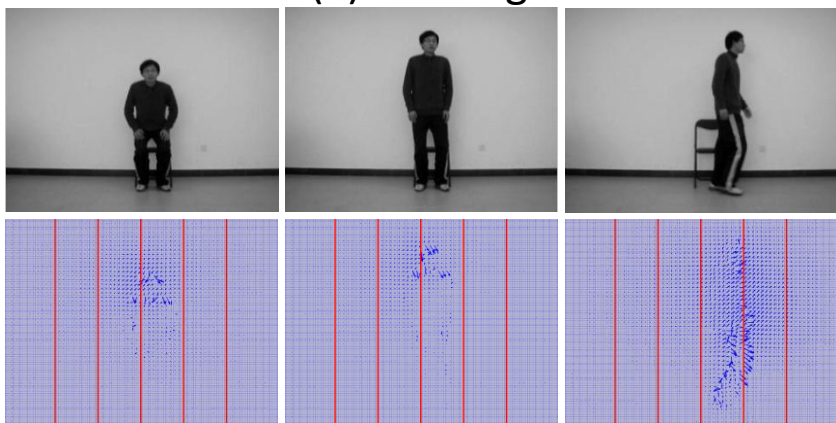

(c) Standing up

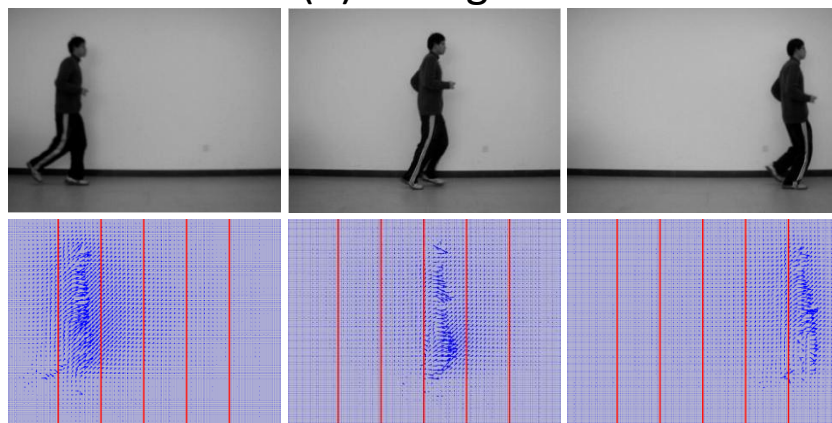

(d) Jogging

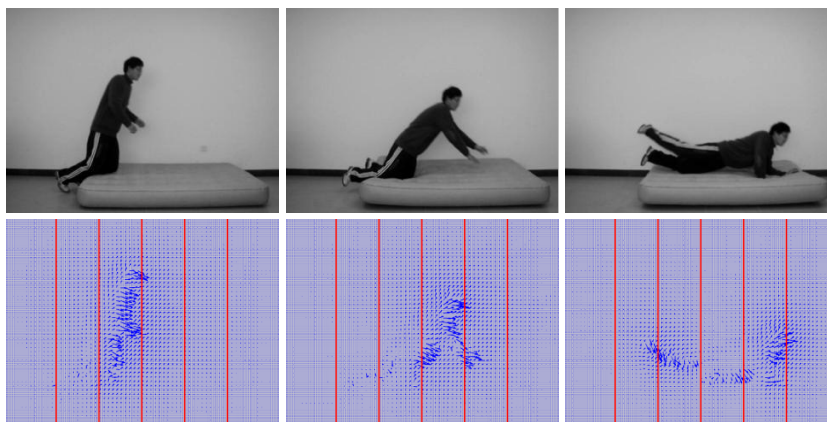

(e) Falling

Supplement: MOESM1 [file 11897500]
